# Supplementary material for: Using Sentinel-1 radar amplitude time series to constrain the timings of individual landslides: a step towards understanding the controls on monsoon-triggered landsliding
Source: Copernicus journal article supplement (doi:10.5194/nhess-22-2637-2022), 2022-08-17
Supplement: Supplementary file 1 [file nhess-22-2637-2022-supplement.zip]

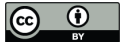

## *Supplement of*

# **Using Sentinel-1 radar amplitude time series to constrain the timings of individual landslides: a step towards understanding the controls on monsoon-triggered landsliding**

**Katy Burrows et al.**

*Correspondence to:* Katy Burrows ([katy.burrows@get.omp.eu](mailto:katy.burrows@get.omp.eu))

- [nhess-22-2637-2022-supplement-title-page.pdf](#)
- [supplement](#)
  - [Supplement-to-Burrows-NHESS-2022.js](#)
  - [Supplementary material vvvh.pdf](#)
  - [landslide\\_examples.pdf](#)

The copyright of individual parts of the supplement might differ from the article licence.
