# Supplementary material for: Using Sentinel-1 radar amplitude time series to constrain the timings of individual landslides: a step towards understanding the controls on monsoon-triggered landsliding
Source: Copernicus journal article supplement (doi:10.5194/nhess-22-2637-2022), 2022-08-17
Supplement: Supplementary file 2 [file nhess-22-2637-2022-supplement.zip]

**Supplementary Material 1:** Time series of the mean daily rainfall across the study area for Zimbabwe and Hiroshima. These time series were obtained using the NASA Global Precipitation Measurement (GPM) with Google Earth Engine (see [https://developers.google.com/earth-engine/datasets/catalog/NASA\\_GPM\\_L3\\_IMERG\\_V06](https://developers.google.com/earth-engine/datasets/catalog/NASA_GPM_L3_IMERG_V06) for further details)

We present these time series to better illustrate the evolution of the triggering rainfall through time. The peak rainfall in each case is shown by the solid black line.

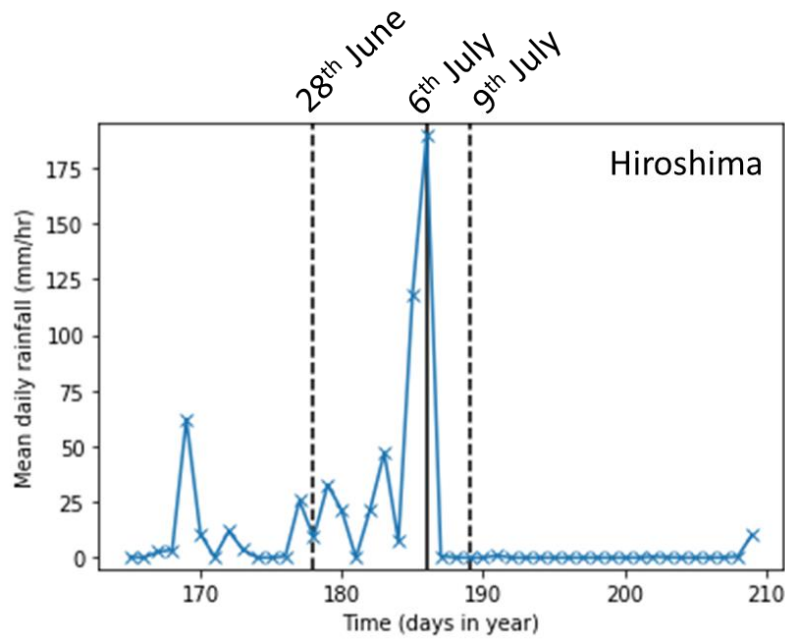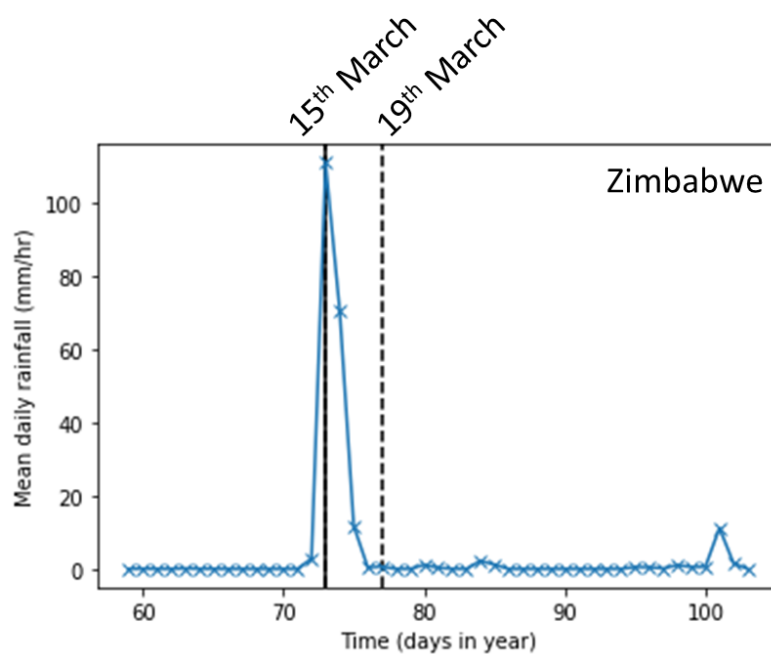

**Supplementary material 2:** A comparison of the results shown in Table 2 of the main manuscript when calculated with VV and VH-polarised Sentinel-1 data.

|                                                            | Hiroshima, VV |         | Hiroshima, VH |         | Zimbabwe, VV |        | Zimbabwe VH |        |
|------------------------------------------------------------|---------------|---------|---------------|---------|--------------|--------|-------------|--------|
| Orbit direction                                            | desc          | asc     | desc          | asc     | desc         | asc    | desc        | asc    |
| Total landslides                                           | 543           |         | 543           |         | 383          |        | 383         |        |
| non-masked                                                 | 543           | 540     | 543           | 540     | 383          | 383    | 383         | 383    |
| <i>Individual techniques</i>                               |               |         |               |         |              |        |             |        |
| Landslide-background inc                                   | 44/177        | 39/97   | 4/38          | 25/88   | 39/67        | 27/72  | 6/17        | 3/17   |
| Landslide-background dec                                   | 56/182        | 121/226 | 81/182        | 164/275 | 41/172       | 55/147 | 62/252      | 80/256 |
| Pixel variability                                          | 101/258       | 101/167 | 55/128        | 144/252 | 79/158       | 52/112 | 41/140      | 38/98  |
| Geometric shadows                                          | 50/144        | 143/192 | 78/154        | 211/323 | 35/60        | 48/75  | 57/148      | 78/181 |
| Geometric bright spots                                     | 35/89         | 50/68   | 3/20          | 6/21    | 28/43        | 10/11  | 0/2         | 1/1    |
| <i>Combined techniques, single track</i>                   |               |         |               |         |              |        |             |        |
| Combined ( $\geq 2Te$ )                                    | 55/71         | 91/105  | 34/42         | 112/139 | 40/52        | 39/43  | 23/56       | 40/74  |
| Combined ( $\geq 3Te$ )                                    | 14/16         | 31/32   | 1/1           | 2/3     | 11/11        | 2/2    | 0/0         | 0/0    |
| Combined (4Te)                                             | 1/1           | 5/5     | 0/0           | 0/1     | 0/0          | 0/0    | 0/0         | 0/0    |
| <i>Combined techniques, combined tracks (final method)</i> |               |         |               |         |              |        |             |        |
| Asc & desc (total)                                         | 135/171       |         | 171/227       |         | 82/113       |        | 65/144      |        |
| Asc & desc (2Te, 1Tr)                                      | 80/111        |         | 142/191       |         | 76/95        |        | 57/126      |        |
| Asc & desc ( $\geq 3Te$ )                                  | 55/60         |         | 29/36         |         | 17/18        |        | 8/18        |        |
| Random baseline                                            | 7%            | 17%     | 7%            | 17%     | 10%          | 7%     | 10%         | 7%     |

In some cases, for example the descending track on Hiroshima, VH is able to correctly identify more landslide timings when applying the landslide-background decrease technique. This is expected, since VH is generally more sensitive to volume scattering (here within the forest canopy) and this scattering component is expected to be lower for an unvegetated landslide scar than it was prior to the failure when the area was forested. However, for the other methods, VV generally outperforms VH, so that when the techniques are combined, a better result is obtained using VV than VH. Therefore, we chose to present the results using VV in the main manuscript. Working with VV data also has the advantage of more Sentinel-1 images being available, since almost all images acquired by Sentinel-1 prior to 2017 are single-pol rather than dual-pol.
