# Supplementary material for: Using Sentinel-1 radar amplitude time series to constrain the timings of individual landslides: a step towards understanding the controls on monsoon-triggered landsliding
Source: Copernicus journal article supplement (doi:10.5194/nhess-22-2637-2022), 2022-08-17
Supplement: Supplementary file 3 [file nhess-22-2637-2022-supplement.zip]

Archive with 5 entries (4 files):
- supplement/
- supplement/landslide_examples.pdf
- supplement/Supplement-to-Burrows-NHESS-2022.js
- supplement/Supplementary material vvvh.pdf
- nhess-22-2637-2022-supplement-title-page.pdf
