# Supplementary material for: Using Sentinel-1 radar amplitude time series to constrain the timings of individual landslides: a step towards understanding the controls on monsoon-triggered landsliding
Source: Copernicus journal article supplement (doi:10.5194/nhess-22-2637-2022), 2022-08-17
Supplement: Supplementary file 3 [file nhess-22-2637-2022-supplement.zip › supplement/landslide_examples.pdf]

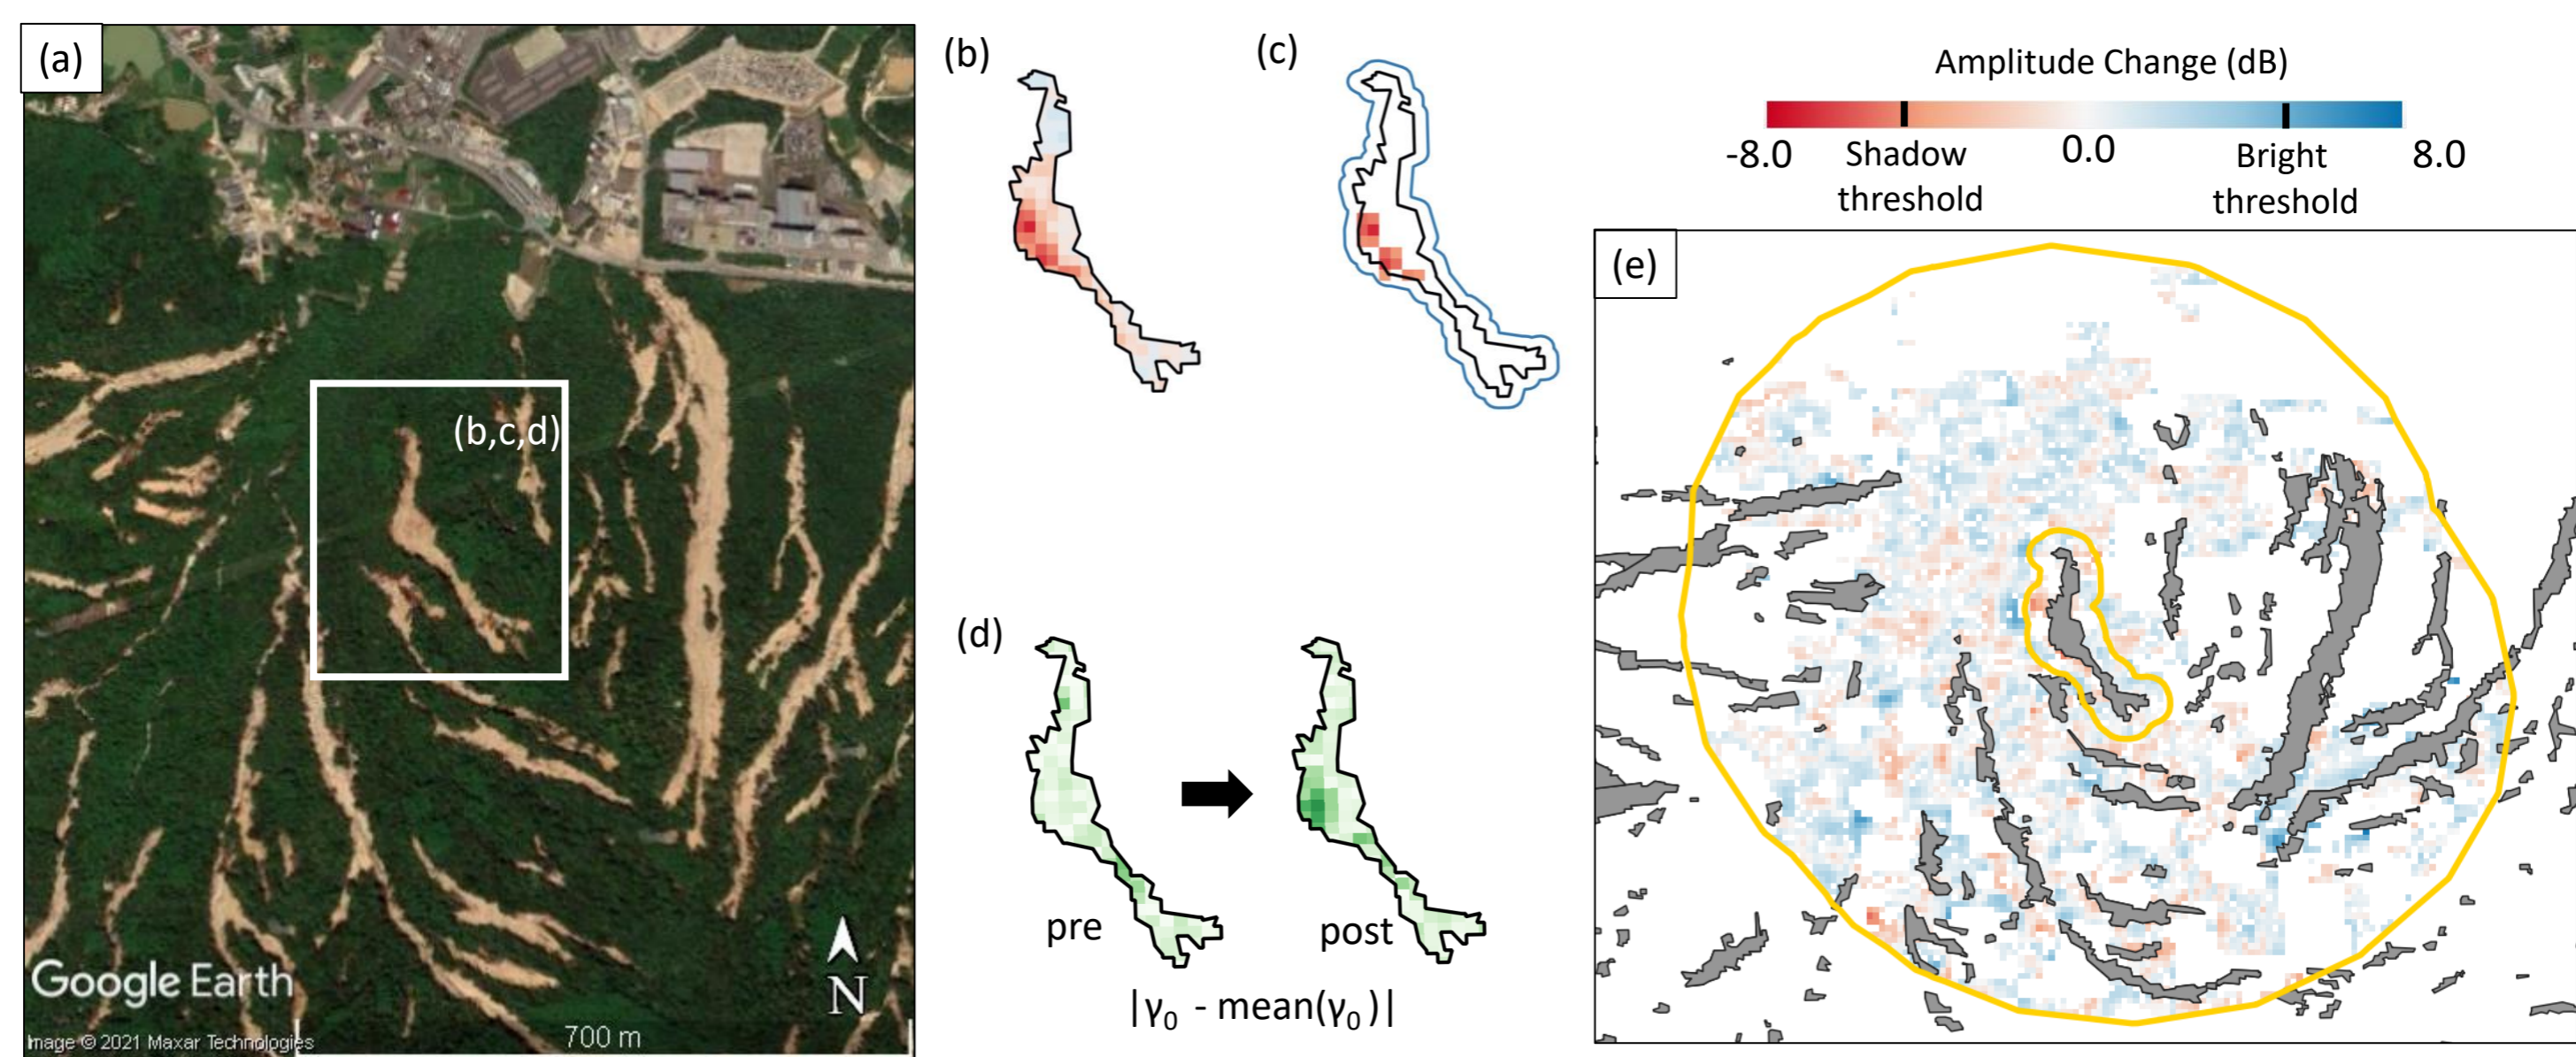

**Example landslide 1:** Landslides triggered by heavy rain in Hiroshima, 2018 (Image © 2021 Google, Maxar technologies). (b) Difference between pre-event and post-event  $\gamma_0$  for one landslide polygon (c)  $\gamma_0$  change for shadow pixels (red) and bright pixels (blue) selected from within a 10 m buffer of the landslide polygon. (d) absolute value of  $(\gamma_0 - \text{mean}(\gamma_0))$  before and after the landslide (showing increased pixel variability) (e)  $\gamma_0$  change for background pixels selected from between 30 m and 500 m from the landslide polygon. Landslide polygons (grey) from the Association of Japanese Geographers (2019)

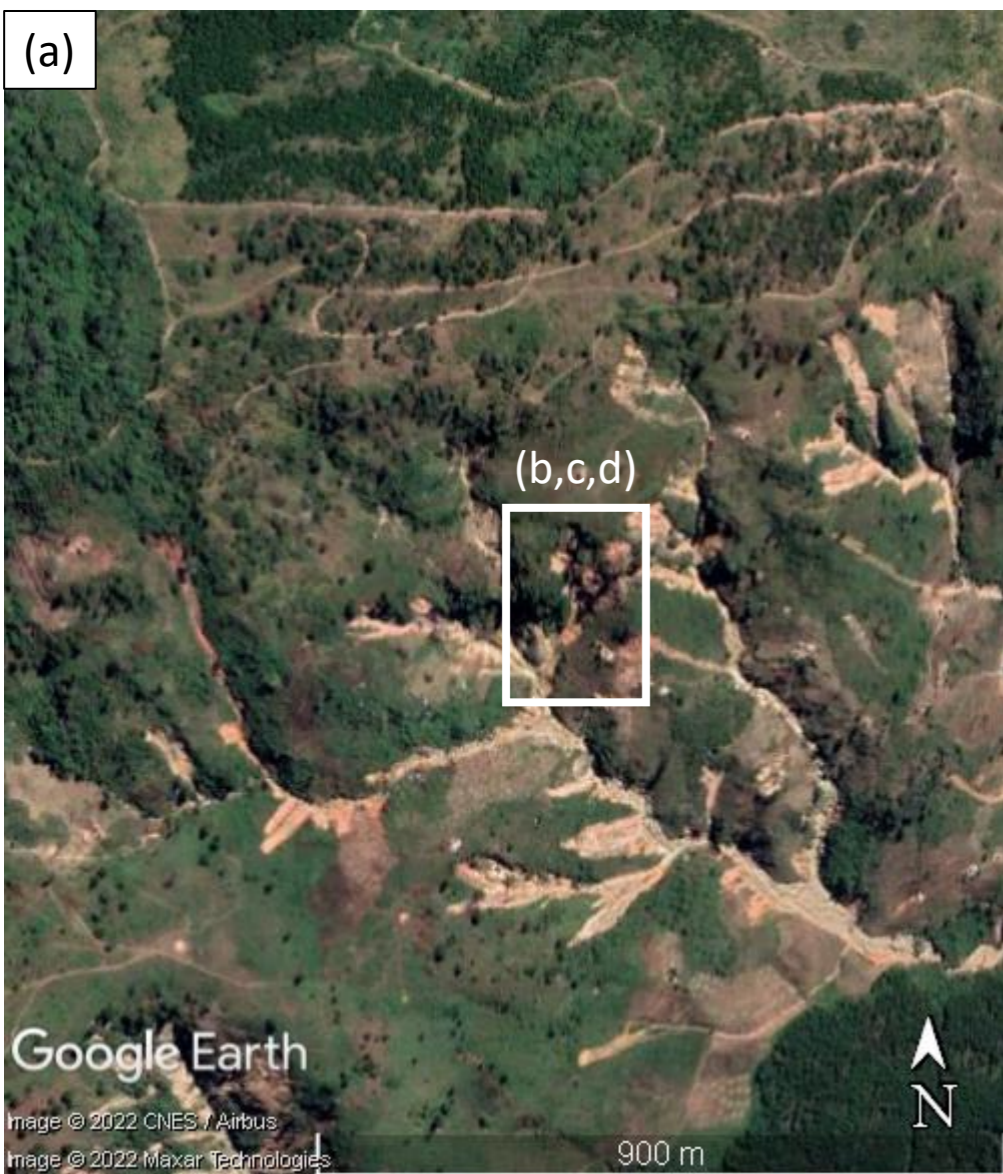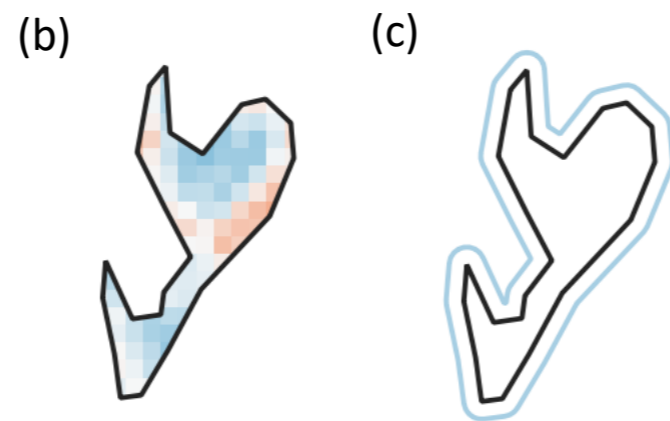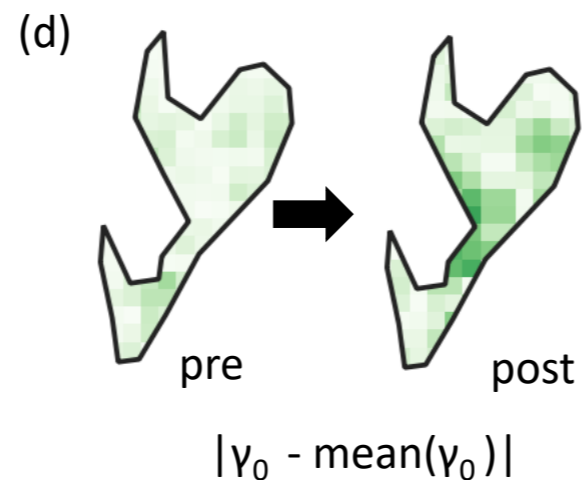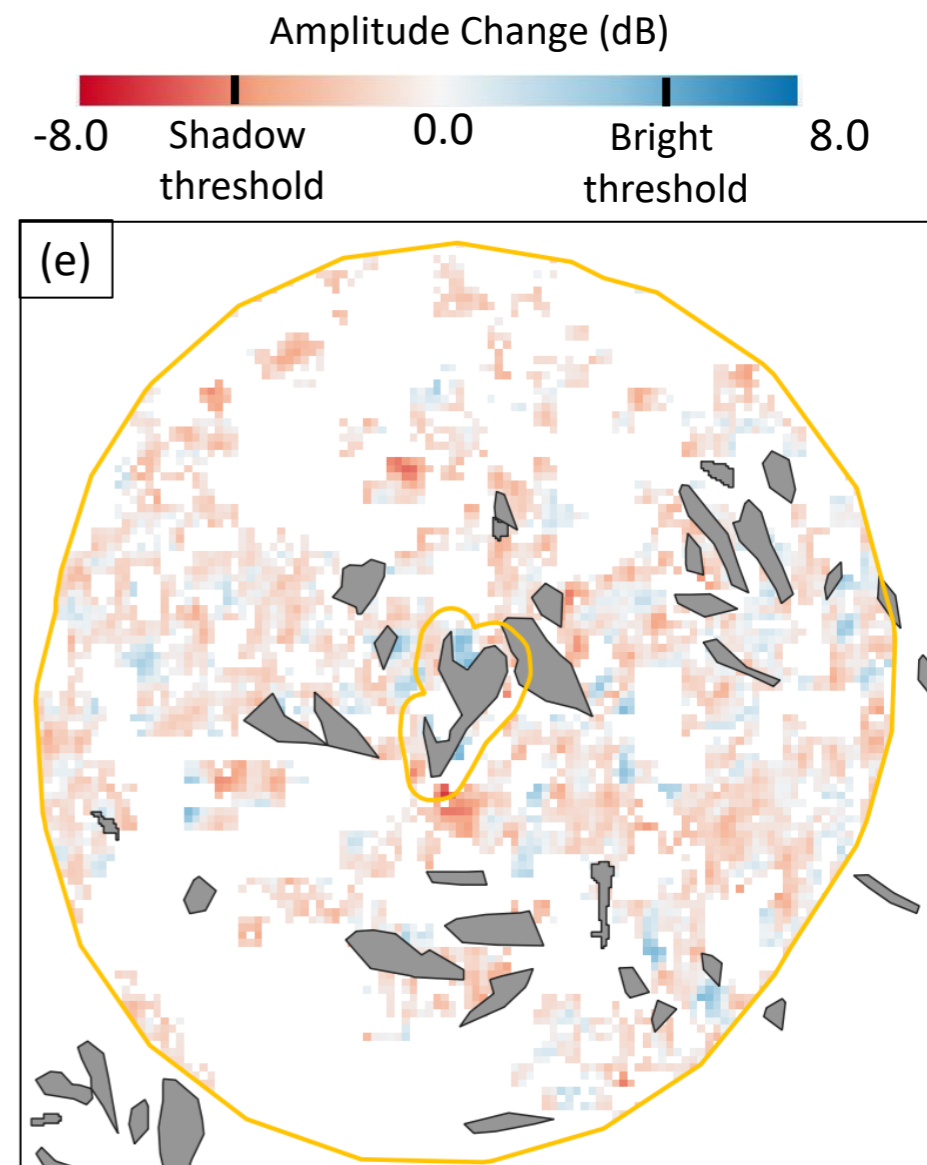

**Example landslide 2:** Landslides triggered by heavy rain in Zimbabwe, 2019 (Image © 2022 Google, CNES Airbus, Maxar technologies). (b) Difference between pre-event and post-event  $\gamma_0$  for one landslide polygon (c)  $\gamma_0$  change for shadow pixels (red) and bright pixels (blue) selected from within a 10 m buffer of the landslide polygon. (d) absolute value of  $(\gamma_0 - \text{mean}(\gamma_0))$  before and after the landslide (showing increased pixel variability) (e)  $\gamma_0$  change for background pixels selected from between 30 m and 500 m from the landslide polygon. Landslide polygons (grey) from Emberson et al. (2021).

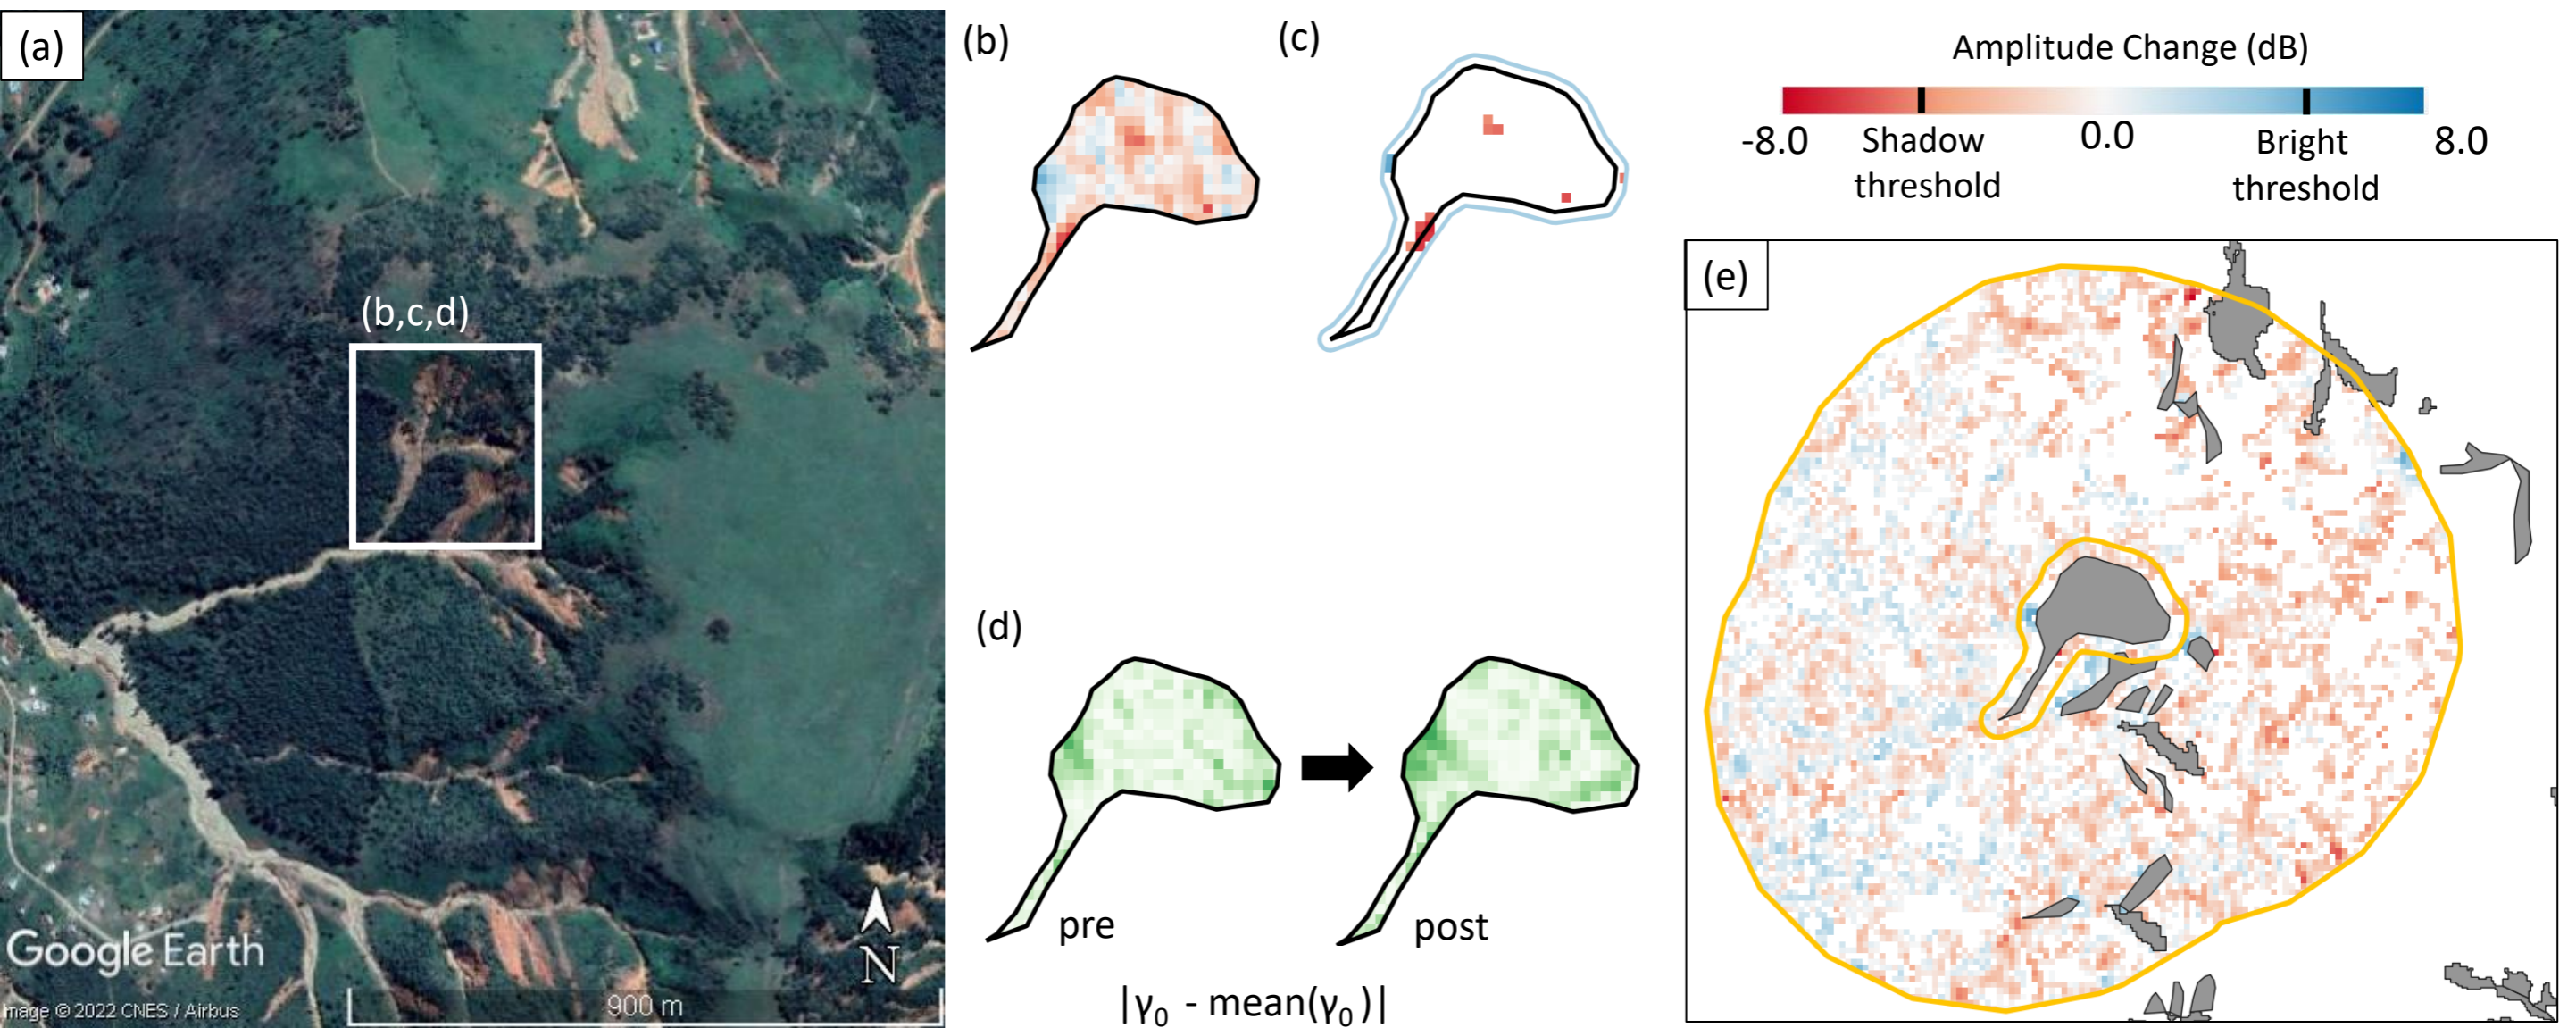

**Example landslide 2:** Landslides triggered by heavy rain in Zimbabwe, 2019 (Image © 2022 Google, CNES Airbus). (b) Difference between pre-event and post-event  $\gamma_0$  for one landslide polygon (c)  $\gamma_0$  change for shadow pixels (red) and bright pixels (blue) selected from within a 10 m buffer of the landslide polygon. (d) absolute value of  $(\gamma_0 - \text{mean}(\gamma_0))$  before and after the landslide (showing increased pixel variability) (e)  $\gamma_0$  change for background pixels selected from between 30 m and 500 m from the landslide polygon. Landslide polygons (grey) from Emberson et al. (2021).
